# Supplementary material for: Effect of types of placenta previa on maternal and neonatal outcomes: A 10-year retrospective cohort study
Source: Research Square preprint supplement (doi:10.21203/rs.3.rs-17936/v2), 2021-04-13
Supplement: Supplementary file 1 [file e33d1bf83f3c390e68780176.docx]

Table S5: Maternal outcomes in complete placenta previa group compared with marpartial placenta previa group.

| Variables | Marpartial | Complete | Marpartial as reference* | Complete  aOR(95%CI) |
| --- | --- | --- | --- | --- |
| (n=1373) | (n=2651) |
| PAS | 351(25.6%) | 1438(54.2%) | 1 | 2.92(2.51-3.4) |
| PPH | 219(16%) | 1175(44.3%) | 1 | 3.7(3.11-4.41) |
| Severe PPH | 42(3.1%) | 422(15.9%) | 1 | 4.7(3.36-6.55) |
| Shock | 95(6.9%) | 640(24.1%) | 1 | 3.54(2.81-4.47) |
| Blood transfusion | 171(12.5%) | 994(37.5%) | 1 | 3.48(2.88-4.19) |
| Bladder rupture | 5(0.4%) | 30(1.1%) |  | 1.67(0.64-4.38) |
| Uterine rupture | 7(0.5%) | 17(0.6%) | 1 | 0.78(0.32-1.92) |
| Hysterectomy | 28(2%) | 205(7.7%) | 1 | 2.99(1.99-4.5) |
| Puerperal infection | 37(2.7%) | 118(4.5%) | 1 | 1.41(0.96-2.06) |
| ICU | 20(1.5%) | 149(5.6%) |  |  |
| Hospital stay(d) | 8.71±5.21 | 10.36±6 |  |  |
| Maternal death | 0 | 1 |  |  |

PAS: placenta accrete spectrum; PPH: postpartum hemorrhage; ICU: intensive care unit;

CI: confidence interval; aOR: adjusted odds ratios;

*Logistic regression analysis was used. Adjusted factors included maternal age, gestational week, prior numbers of cesarean sections, abortions, and vaginal deliveries, level of education, mode of delivery and location of placenta.
